# Supplementary material for: Global and Regional Trends in the Burden of Epilepsy in Adolescents (0-19 Years) from 1990 to 2023: A Comprehensive Analysis of Incidence, Prevalence, Mortality, and DALYs by Sex and Socio-Demographic Index
Source: Research Square preprint supplement (doi:10.21203/rs.3.rs-7254884/v1), 2025-08-12
Supplement: Supplementary file 1 [file 69d161175709f59de2d3fae2.docx]

Table 1. Global epilepsy incidence in children and adolescents aged 0-19 years, 1990-2023: Age-standardized rates, trends, and demographic patterns

| Characteristics | 1990 | | | | 2023 | | | | 1990-2023 | | |
| --- | --- | --- | --- | --- | --- | --- | --- | --- | --- | --- | --- |
| Number（95%UI） | | ASIR（95%UI） | | Number（95%UI） | | ASIR（95%UI） | | EAPC（95%CI） | | |
| **Global** | |  | |  | |  | |  | |  |
|  | | 2190.97(1379.25-3277.54) | | 48.68(28.75-75.51) | | 2859.16(1821.71-4168.20) | | 54.04(32.36-81.85) | | 0.34 (0.31- 0.37) |
| Sex | |  | |  | |  | |  | |  |
| Male | | 1169.27(735.88-1742.55) | | 50.65(29.88-78.50) | | 1539.79(981.23-2220.82) | | 56.58(33.99-84.87) | | 0.36 (0.33-0.39) |
| Female | | 1021.69(642.87-1532.39) | | 46.60(27.50-72.42) | | 1319.37(838.51-1927.21) | | 51.35(30.61-78.17) | | 0.33 (0.29-0.36) |
| **Age** | |  | |  | |  | |  | |  |
| <5 years | | 349.26(220.57-519.53) | | 56.86(35.91-84.58) | | 399.41(253.69-583.26) | | 62.19(39.5-90.82) | | 0.29 (0.25-0.34) |
| 5-9 years | | 306.41(171.46-486.62) | | 52.62(29.44-83.57) | | 397.13(218.76-618.97) | | 56.76(31.27-88.47) | | 0.29 (0.24-0.34) |
| 10-14 years | | 245.92(139.26-398.01) | | 45.85(25.97-74.21) | | 351.11(202.79-539.91) | | 51.51(29.75-79.2) | | 0.39 (0.37-0.42) |
| 15-19 years | | 193.90(115.93-294.45) | | 37.24(22.27-56.55) | | 281.93(179.33-426.27) | | 43.77(27.84-66.17) | | 0.45 (0.42-0.48) |
| Socio-demographicindex | |  | |  | |  | |  | |  |
| Low SDI | | 456.06(245.24-758.61) | | 51.21(26.44-87.16) | | 975.29(613.28-1466.80) | | 57.64(34.97-89.62) | | 0.34 (0.31-0.38) |
| Low-middle SDI | | 329.23(188.49-527.83) | | 45.62(24.69-74.77) | | 464.59(270.73-695.48) | | 51.37(28.66-79.65) | | 0.43 (0.40-0.47) |
| Middle SDI | | 274.39(169.98-415.87) | | 46.66(26.82-73.20) | | 356.53(216.16-539.99) | | 53.82(30.87-84.70) | | 0.44 (0.42-0.45) |
| High-middle SDI | | 507.38(315.97-758.43) | | 52.16(30.22-81.25) | | 500.35(306.08-770.58) | | 54.65(31.55-86.65) | | 0.18 (0.14-0.23) |
| High SDI | | 604.19(376.41-898.72) | | 46.90(27.68-71.89) | | 537.22(312.34-833.47) | | 49.89(27.63-80.85) | | 0.23 (0.16-0.30) |
| High-income Asia Pacific | | 51.08(28.24-83.73) | | 54.11(29.04-90.95) | | 30.84(17.82-49.62) | | 54.59(29.24-91.83) | | 0.02 (-0.05-0.09) |
| High-income North America | | 64.91(37.09-103.86) | | 39.94(21.57-66.73) | | 74.91(41.90-118.48) | | 42.05(22.26-69.21) | | 0.17 (0.05-0.29) |
| Regions | |  | |  | |  | |  | |  |
| Western Europe | | 126.04(76.27-196.66) | | 64.98(36.83-104.23) | | 135.99(73.61-216.48) | | 74.08(38.72-120.44) | | 0.38 (0.30-0.46) |
| Australasia | | 7.22(2.69-12.75) | | 58.39(20.64-107.64) | | 8.12(2.99-14.61) | | 53.38(19.57-99.92) | | -0.30 (-0.34--0.26) |
| Andean Latin America | | 36.86(18.61-65.72) | | 96.58(47.42-175.99) | | 40.55(18.14-67.95) | | 89.06(38.80-154.02) | | -0.32 (-0.41--0.23) |
| Tropical Latin America | | 97.47(52.90-150.83) | | 69.91(36.63-113.66) | | 78.53(44.90-120.20) | | 65.53(35.50-105.91) | | -0.11 (-0.32-0.10) |
| Central Latin America | | 159.32(94.30-249.36) | | 96.49(52.82-154.60) | | 152.00(94.88-227.60) | | 90.42(52.50-141.88) | | -0.11 (-0.19- -0.02) |
| Southern Latin America | | 18.27(7.63-31.11) | | 46.97(19.05-82.77) | | 19.79(7.94-33.28) | | 51.94(20.76-91.32) | | 0.32 (0.28- 0.37) |
| Caribbean | | 17.05(9.22-27.99) | | 56.53(28.75-95.85) | | 18.08(9.44-29.63) | | 58.12(28.82-97.62) | | -0.01 (-0.05- 0.03) |
| Central Europe | | 41.12(24.07-63.96) | | 52.86(29.08-87.16) | | 25.79(14.64-40.69) | | 56.07(30.59-93.28) | | 0.26 (0.22- 0.31) |
| Eastern Europe | | 61.48(36.30-96.99) | | 45.49(25.30-74.20) | | 31.89(18.05-49.94) | | 37.97(20.95-62.26) | | -0.74 (-0.82- -0.66) |
| Central Asia | | 38.73(22.52-59.84) | | 60.17(33.17-97.44) | | 45.42(24.24-70.70) | | 60.58(30.87-97.85) | | -0.04 (-0.07- 0.00) |
| North Africa and Middle East | | 196.29(118.10-309.57) | | 54.55(30.64-89.01) | | 276.97(158.19-428.27) | | 58.50(31.17-92.99) | | 0.20 (0.19- 0.22) |
| South Asia | | 426.07(231.37-699.57) | | 39.59(20.90-66.96) | | 595.71(346.03-903.74) | | 43.23(23.94-68.15) | | 0.37 (0.30- 0.44) |
| Southeast Asia | | 208.81(124.04-320.27) | | 47.40(26.69-75.75) | | 229.46(139.22-351.45) | | 51.20(29.51-82.57) | | 0.22 (0.18- 0.25) |
| East Asia | | 281.60(172.74-441.60) | | 31.39(17.86-51.31) | | 223.00(126.27-350.55) | | 33.37(18.22-54.08) | | 0.25 (0.06- 0.43) |
| Oceania | | 2.60(1.06-4.76) | | 38.14(15.22-72.31) | | 5.04(1.75-9.17) | | 37.05(12.23-69.12) | | -0.13 (-0.16- -0.09) |
| Western Sub-Saharan Africa | | 124.68(70.73-203.11) | | 56.81(30.72-95.15) | | 366.07(226.67-550.04) | | 64.58(37.75-100.08) | | 0.37 (0.26- 0.47) |
| Eastern Sub-Saharan Africa | | 161.93(83.35-274.52) | | 73.36(35.85-127.35) | | 357.12(220.72-543.35) | | 75.64(44.29-118.46) | | -0.02 (-0.05- 0.02) |
| Central Sub-Saharan Africa | | 38.63(13.85-76.72) | | 61.28(21.80-122.35) | | 105.14(41.48-186.05) | | 66.06(25.75-119.59) | | 0.33 (0.23- 0.44) |
| Southern Sub-Saharan Africa | | 30.83(18.05-47.38) | | 57.87(31.91-92.53) | | 38.74(22.32-60.49) | | 59.08(32.37-95.62) | | -0.20 (-0.28- -0.11) |
