# Supplementary material for: Global and Regional Trends in the Burden of Epilepsy in Adolescents (0-19 Years) from 1990 to 2023: A Comprehensive Analysis of Incidence, Prevalence, Mortality, and DALYs by Sex and Socio-Demographic Index
Source: Research Square preprint supplement (doi:10.21203/rs.3.rs-7254884/v1), 2025-08-12
Supplement: Supplementary file 2 [file a710ec3d3115f7eeb8e06ea8.docx]

Table 2. Global epilepsy prevalence in children and adolescents aged 0-19 years, 1990-2023: Age-standardized rates, trends, and demographic patterns

| Characteristics | 1990 | | | | 2023 | | | | 1990-2023 | | |
| --- | --- | --- | --- | --- | --- | --- | --- | --- | --- | --- | --- |
| Number（95%UI） | | ASIR（95%UI） | | Number（95%UI） | | ASIR（95%UI） | | EAPC（95%CI） | | |
| **Global** | |  | |  | |  | |  | |  |
|  | | 13409.34(9122.72-18902.81) | | 297.58(197.08-432.48) | | 17265.77(11766.36-23944.67) | | 321.49(213.98-452.81) | | 0.26 (0.24-0.29) |
| **Sex** | |  | |  | |  | |  | |  |
| Male | | 1169.27(735.88-1742.55) | | 50.65(29.88-78.50) | | 1539.79(981.23-2220.82) | | 56.58(33.99-84.87) | | 0.36(0.33-0.39) |
| Female | | 1021.69(642.87-1532.39) | | 46.60(27.50-72.42) | | 1319.37(838.51-1927.21) | | 51.35(30.61-78.17) | | 0.33(0.29-0.36) |
| **Age** | |  | |  | |  | |  | |  |
| <5 years | | 853.89(600.32-1177.14) | | 269.77(189.66-371.9) | | 975.75(728.58-1290.56) | | 294.89(220.19-390.03) | | 0.30 (0.26-0.33) |
| 5-9 years | | 948.06(632.51-1378.23) | | 317.06(211.53-460.93) | | 1203.52(778.56-1709.27) | | 333.77(215.92-474.03) | | 0.22 (0.18-0.27) |
| 10-14 years | | 931.82(582.29-1408.98) | | 339.35(212.06-513.12) | | 1265.81(773.59-1857.30) | | 360.82(220.51-529.43) | | 0.22 (0.19-0.26) |
| 15-19 years | | 872.51(578.19-1257.30) | | 329.62(218.43-474.98) | | 1205.10(813.92-1661.44) | | 364.75(246.35-502.87) | | 0.27 (0.24-0.30) |
| **Socio-demographic index** | |  | |  | |  | |  | |  |
| Low SDI | | 2730.88(1611.71-4138.79) | | 315.88(180.97-492.72) | | 5806.46(3948.75-8334.59) | | 344.31(228.18-502.06) | | 0.26 (0.23-0.30) |
| Low-middle SDI | | 2078.91(1311.11-3085.58) | | 290.48(176.15-438.95) | | 2925.92(1904.63-4184.49) | | 319.52(204.55-464.27) | | 0.35 (0.32-0.38) |
| Middle SDI | | 1595.21(1048.09-2373.90) | | 271.25(171.23-412.23) | | 2081.21(1306.11-2955.82) | | 308.97(190.17-448.92) | | 0.40 (0.38-0.41) |
| High-middle SDI | | 3278.14(2247.08-4687.54) | | 332.56(221.32-480.83) | | 3107.14(2041.08-4328.26) | | 330.83(213.78-473.73) | | 0.02 (-0.02-0.07) |
| High SDI | | 3632.65(2455.54-5072.95) | | 275.91(180.97-390.37) | | 3226.89(2002.60-4695.73) | | 289.24(178.17-425.32) | | 0.19 (0.13-0.26) |
| High-income Asia Pacific | | 274.04(155.76-421.65) | | 269.86(150.25-422.33) | | 162.91(94.90-249.02) | | 271.41(151.63-424.71) | | -0.02 (-0.09-0.05) |
| High-income North America | | 431.50(258.65-642.16) | | 262.36(154.04-396.44) | | 518.10(306.05-757.14) | | 279.16(163.12-414.22) | | 0.24 (0.12-0.36) |
| **Regions** | |  | |  | |  | |  | |  |
| Western Europe | | 605.95(382.47-882.28) | | 304.86(185.36-457.85) | | 660.36(370.68-1012.42) | | 350.79(196.55-544.33) | | 0.41 (0.33-0.49) |
| Australasia | | 38.16(14.74-63.66) | | 298.16(115.11-507.76) | | 41.17(14.96-73.75) | | 260.80(95.43-469.97) | | -0.42 (-0.46--0.38) |
| Andean Latin America | | 228.81(123.78-385.67) | | 603.70(322.53-1017.10) | | 237.23(112.38-384.11) | | 510.57(237.01-847.45) | | -0.56 (-0.67--0.45) |
| Tropical Latin America | | 549.13(345.37-830.19) | | 390.14(236.88-612.67) | | 427.04(256.86-626.31) | | 351.54(209.46-522.44) | | -0.12 (-0.35-0.12) |
| Central Latin America | | 1084.95(678.49-1588.99) | | 657.71(404.48-974.15) | | 960.52(635.79-1356.40) | | 560.29(360.84-805.93) | | -0.36 (-0.45--0.26) |
| Southern Latin America | | 105.47(43.87-168.78) | | 269.85(110.26-439.04) | | 118.13(52.75-190.98) | | 292.40(128.40-474.94) | | 0.27 (0.23-0.31) |
| Caribbean | | 97.26(56.02-152.43) | | 320.45(177.16-505.19) | | 99.28(50.22-155.31) | | 314.08(159.92-502.12) | | -0.15 (-0.19--0.10) |
| Central Europe | | 266.50(157.60-405.05) | | 327.58(192.75-508.86) | | 168.05(99.78-248.05) | | 344.82(202.96-518.77) | | 0.22 (0.17-0.27) |
| Eastern Europe | | 338.26(219.67-498.43) | | 248.41(156.75-373.30) | | 165.80(100.74-250.37) | | 187.79(112.84-290.67) | | -1.10 (-1.21--0.99) |
| Central Asia | | 270.04(165.30-388.74) | | 430.86(258.54-628.35) | | 313.82(191.84-454.12) | | 425.24(254.20-626.23) | | -0.02 (-0.07-0.04) |
| North Africa and Middle East | | 1290.73(811.09-1908.45) | | 362.48(223.78-552.00) | | 1738.02(1016.07-2553.56) | | 363.03(211.14-542.27) | | 0.03 (-0.01-0.06) |
| South Asia | | 2842.42(1764.32-4156.33) | | 265.85(160.97-402.87) | | 4076.63(2703.40-5827.63) | | 293.87(189.73-425.84) | | 0.37 (0.32-0.41) |
| Southeast Asia | | 1159.20(734.41-1661.15) | | 262.07(161.22-386.81) | | 1331.25(858.67-1940.61) | | 288.81(182.10-426.50) | | 0.26 (0.21-0.30) |
| East Asia | | 1858.64(1214.91-2701.46) | | 201.22(129.36-298.37) | | 1375.57(837.57-1947.24) | | 198.62(119.12-287.94) | | -0.06 (-0.22-0.10) |
| Oceania | | 14.71(6.82-25.45) | | 221.58(101.46-392.30) | | 28.48(10.85-49.20) | | 214.66(80.89-376.77) | | -0.16 (-0.20--0.12) |
| Western Sub-Saharan Africa | | 658.57(408.71-1005.14) | | 313.47(187.23-482.38) | | 2019.11(1371.47-2876.58) | | 361.49(236.11-526.35) | | 0.46 (0.38-0.55) |
| Eastern Sub-Saharan Africa | | 873.26(473.79-1435.63) | | 412.78(218.00-684.20) | | 1955.53(1242.33-2803.00) | | 417.09(262.21-607.59) | | -0.06 (-0.10--0.02) |
| Central Sub-Saharan Africa | | 238.90(84.04-441.33) | | 395.07(137.36-750.24) | | 639.47(274.14-1095.97) | | 408.95(173.01-705.74) | | 0.32 (0.19-0.45) |
| Southern Sub-Saharan Africa | | 182.85(113.95-263.57) | | 344.63(207.13-512.61) | | 229.29(143.48-337.51) | | 345.48(210.48-514.77) | | -0.24 (-0.33--0.16) |
