# Supplementary material for: Global and Regional Trends in the Burden of Epilepsy in Adolescents (0-19 Years) from 1990 to 2023: A Comprehensive Analysis of Incidence, Prevalence, Mortality, and DALYs by Sex and Socio-Demographic Index
Source: Research Square preprint supplement (doi:10.21203/rs.3.rs-7254884/v1), 2025-08-12
Supplement: Supplementary file 3 [file dec624836589f421887465f8.docx]

Table 4 Global epilepsy mortality in children and adolescents aged 0-19 years, 1990-2023: Age-standardized rates, trends, and demographic patterns

| Characteristics | 1990 | | | | 2023 | | | | 1990-2023 | | |
| --- | --- | --- | --- | --- | --- | --- | --- | --- | --- | --- | --- |
| Number（95%UI） | | ASIR（95%UI） | | Number（95%UI） | | ASIR（95%UI） | | EAPC（95%CI） | | |
| **Global** | |  | |  | |  | |  | |  |
|  | | 91.26(59.73-124.45) | | 2.02(1.33-2.76) | | 83.76(59.51-118.48) | | 1.59(1.12-2.27) | | -0.86 (-1.05- -0.67) |
| **Sex** | |  | |  | |  | |  | |  |
| Male | | 52.81(34.19-80.22) | | 2.28(1.43-3.48) | | 49.34(32.58-74.41) | | 1.82(1.19-2.78) | | -0.78 (-0.97- -0.60) |
| Female | | 38.46(23.39-56.39) | | 1.74(1.04-2.61) | | 34.42(22.07-53.47) | | 1.34(0.85-2.12) | | -0.97 (-1.17- -0.77) |
| **Age** | |  | |  | |  | |  | |  |
| <5 years | | 2042.39(1447.48-2725.13) | | 332.52(235.66-443.67) | | 1892.51(1401.25-2605.65) | | 294.67(218.18-405.71) | | -0.33 (-0.51- -0.16) |
| 5-9 years | | 1391.00(997.97-1877.88) | | 238.87(171.38-322.49) | | 1210.47(871.21-1699.52) | | 173.01(124.52-242.91) | | -0.97 (-1.03- -0.92) |
| 10-14 years | | 1275.82(896.12-1693.40) | | 237.87(167.08-315.73) | | 1407.30(1003.69-1884.10) | | 206.44(147.24-276.39) | | -0.51 (-0.56- -0.45) |
| 15-19 years | | 1510.94(1108.41-1938.78) | | 290.19(212.88-372.36) | | 1633.63(1230.70-2207.73) | | 253.6(191.05-342.72) | | -0.60 (-0.69- -0.51) |
| **Socio-demographic index** | |  | |  | |  | |  | |  |
| Low SDI | | 35.85(22.26-51.66) | | 4.13(2.56-5.92) | | 49.50(34.01-72.12) | | 2.93(1.98-4.31) | | -1.22 (-1.50- -0.95) |
| Low-middle SDI | | 20.13(11.60-30.71) | | 2.80(1.61-4.26) | | 15.21(9.85-23.10) | | 1.68(1.08-2.59) | | -1.56 (-1.73- -1.40) |
| Middle SDI | | 6.85(3.97-9.19) | | 1.16(0.67-1.58) | | 5.68(3.90-7.97) | | 0.86(0.59-1.22) | | -1.02 (-1.09- -0.95) |
| High-middle SDI | | 16.48(11.14-20.68) | | 1.67(1.13-2.12) | | 8.18(6.45-10.43) | | 0.92(0.72-1.20) | | -1.88 (-1.97- -1.79) |
| High SDI | | 11.71(9.15-14.33) | | 0.89(0.70-1.11) | | 5.02(4.38-5.80) | | 0.46(0.40-0.53) | | -2.36 (-2.50- -2.22) |
| High-income Asia Pacific | | 0.56(0.44-0.71) | | 0.56(0.43-0.73) | | 0.21(0.17-0.24) | | 0.34(0.28-0.40) | | -1.99 (-2.37- -1.60) |
| High-income North America | | 0.41(0.34-0.47) | | 0.25(0.21-0.29) | | 0.71(0.61-0.83) | | 0.39(0.33-0.45) | | 1.56 (1.03- 2.09) |
| **Regions** | |  | |  | |  | |  | |  |
| Western Europe | | 0.92(0.81-1.03) | | 0.46(0.40-0.52) | | 0.73(0.65-0.83) | | 0.39(0.34-0.44) | | -0.22 (-0.32- -0.13) |
| Australasia | | 0.08(0.07-0.09) | | 0.63(0.54-0.73) | | 0.06(0.05-0.07) | | 0.37(0.32-0.44) | | -1.32 (-1.40- -1.25) |
| Andean Latin America | | 0.63(0.48-0.77) | | 1.64(1.24-2.03) | | 0.48(0.39-0.58) | | 1.03(0.85-1.27) | | -1.52 (-1.65- -1.38) |
| Tropical Latin America | | 0.99(0.88-1.13) | | 0.73(0.64-0.84) | | 1.02(0.90-1.16) | | 0.85(0.74-0.98) | | -0.36 (-0.56- -0.15) |
| Central Latin America | | 2.61(2.35-2.87) | | 1.57(1.42-1.74) | | 2.20(2.00-2.44) | | 1.33(1.21-1.48) | | -0.83 (-1.01- -0.65) |
| Southern Latin America | | 0.24(0.22-0.27) | | 0.62(0.55-0.69) | | 0.18(0.16-0.20) | | 0.44(0.39-0.50) | | -0.40 (-0.51- -0.30) |
| Caribbean | | 0.54(0.36-0.71) | | 1.76(1.16-2.38) | | 0.45(0.29-0.62) | | 1.42(0.91-2.01) | | -0.69 (-0.90- -0.47) |
| Central Europe | | 0.69(0.61-0.77) | | 0.87(0.76-0.99) | | 0.24(0.21-0.26) | | 0.48(0.42-0.54) | | -0.93 (-1.03- -0.84) |
| Eastern Europe | | 0.88(0.79-0.97) | | 0.64(0.58-0.71) | | 0.18(0.16-0.20) | | 0.20(0.17-0.22) | | -2.90 (-3.13- -2.67) |
| Central Asia | | 1.14(1.03-1.25) | | 1.79(1.60-2.00) | | 1.37(1.20-1.56) | | 1.86(1.59-2.17) | | -0.40 (-0.52- -0.28) |
| North Africa and Middle East | | 7.30(4.14-10.64) | | 2.02(1.16-2.96) | | 4.92(3.56-6.76) | | 1.05(0.75-1.44) | | -1.42 (-1.47- -1.37) |
| South Asia | | 30.55(16.27-47.22) | | 2.86(1.48-4.42) | | 19.27(12.75-29.58) | | 1.43(0.93-2.21) | | -1.38 (-1.51- -1.25) |
| Southeast Asia | | 2.50(1.28-3.92) | | 0.57(0.29-0.90) | | 2.03(1.14-3.11) | | 0.45(0.25-0.70) | | -0.41 (-0.45- -0.36) |
| East Asia | | 14.89(9.05-20.68) | | 1.59(0.93-2.27) | | 3.26(2.28-4.63) | | 0.48(0.33-0.69) | | -2.62 (-2.76- -2.48) |
| Oceania | | 0.05(0.03-0.08) | | 0.80(0.49-1.22) | | 0.09(0.06-0.15) | | 0.73(0.44-1.17) | | -0.28 (-0.33- -0.23) |
| Western Sub-Saharan Africa | | 6.74(4.03-10.30) | | 3.16(1.90-4.91) | | 18.61(11.03-29.51) | | 3.29(1.95-5.27) | | 0.32 (0.14- 0.50) |
| Eastern Sub-Saharan Africa | | 16.43(10.51-23.47) | | 7.72(4.92-11.02) | | 22.52(15.64-31.79) | | 4.79(3.23-6.87) | | -1.46 (-1.66- -1.26) |
| Central Sub-Saharan Africa | | 2.24(1.44-3.20) | | 3.80(2.40-5.52) | | 4.36(2.79-6.46) | | 2.82(1.78-4.22) | | -0.56 (-0.64- -0.48) |
| Southern Sub-Saharan Africa | | 0.90(0.65-1.21) | | 1.68(1.21-2.31) | | 0.87(0.64-1.19) | | 1.34(0.97-1.84) | | -0.46 (-0.53- -0.39) |
