# Supplementary material for: Global and Regional Trends in the Burden of Epilepsy in Adolescents (0-19 Years) from 1990 to 2023: A Comprehensive Analysis of Incidence, Prevalence, Mortality, and DALYs by Sex and Socio-Demographic Index
Source: Research Square preprint supplement (doi:10.21203/rs.3.rs-7254884/v1), 2025-08-12
Supplement: Supplementary file 4 [file e91896317b9fc835cdda7adb.docx]

Table 3. Global epilepsy DALYs in children and adolescents aged 0-19 years, 1990-2023: Age-standardized rates, trends, and demographic patterns

| Characteristics | 1990 | | | | 2023 | | | | 1990-2023 | | |
| --- | --- | --- | --- | --- | --- | --- | --- | --- | --- | --- | --- |
| Number（95%UI） | | ASIR（95%UI） | | Number（95%UI） | | ASIR（95%UI） | | EAPC（95%CI） | | |
| **Global** | |  | |  | |  | |  | |  |
|  | | 12440.29(8919.27-16216.87) | | 275.56(197.09-364.93) | | 12287.81(9181.26-16690.68) | | 232.24(170.39-317.63) | | -0.57 (-0.67- -0.47) |
| **Sex** | |  | |  | |  | |  | |  |
| Male | | 7004.99(4949.25-9603.53) | | 302.73(213.14-419.03) | | 6964.62(5132.23-9660.67) | | 256.07(184.18-357.44) | | -0.55 (-0.65- -0.45) |
| Female | | 5435.30(3842.28-7503.55) | | 246.96(170.76-346.27) | | 5323.20(3581.59-7466.87) | | 206.96(137.02-293.95) | | -0.60 (-0.70- -0.50) |
| **Age** | |  | |  | |  | |  | |  |
| <5 years | | 2042.39(1447.48-2725.13) | | 332.52(235.66-443.67) | | 1892.51(1401.25-2605.65) | | 294.67(218.18-405.71) | | -0.33 (-0.51- -0.16) |
| 5-9 years | | 1391.00(997.97-1877.88) | | 238.87(171.38-322.49) | | 1210.47(871.21-1699.52) | | 173.01(124.52-242.91) | | -0.97 (-1.03- -0.92) |
| 10-14 years | | 1275.82(896.12-1693.40) | | 237.87(167.08-315.73) | | 1407.30(1003.69-1884.10) | | 206.44(147.24-276.39) | | -0.51 (-0.56- -0.45) |
| 15-19 years | | 1510.94(1108.41-1938.78) | | 290.19(212.88-372.36) | | 1633.63(1230.70-2207.73) | | 253.6(191.05-342.72) | | -0.60 (-0.69- -0.51) |
| **Socio-demographic index** | |  | |  | |  | |  | |  |
| Low SDI | | 4086.28(2896.24-5576.18) | | 467.64(329.26-637.97) | | 6156.38(4548.67-8402.29) | | 364.42(264.92-503.51) | | -0.85 (-1.04- -0.67) |
| Low-middle SDI | | 2512.37(1640.77-3575.92) | | 349.20(225.67-498.86) | | 2242.11(1587.56-3066.14) | | 248.03(171.44-345.08) | | -1.00 (-1.10- -0.90) |
| Middle SDI | | 1175.48(791.23-1603.93) | | 199.81(133.05-277.56) | | 1119.29(771.83-1603.22) | | 168.11(114.18-243.96) | | -0.56 (-0.58- -0.53) |
| High-middle SDI | | 2553.64(1847.23-3342.88) | | 259.92(184.89-344.66) | | 1556.85(1135.36-2214.29) | | 170.82(123.12-241.79) | | -1.27 (-1.32- -1.23) |
| High SDI | | 2069.46(1504.38-2780.58) | | 158.02(114.28-216.31) | | 1174.23(800.18-1760.01) | | 106.34(71.63-159.64) | | -1.35 (-1.40- -1.30) |
| High-income Asia Pacific | | 117.71(75.21-183.64) | | 117.70(75.10-182.66) | | 49.40(31.42-83.87) | | 82.49(51.16-141.65) | | -1.28 (-1.47- -1.08) |
| High-income North America | | 134.77(77.90-215.33) | | 81.95(46.62-133.01) | | 169.67(108.50-267.72) | | 92.15(58.69-144.57) | | 0.41 (0.30- 0.52) |
| **Regions** | |  | |  | |  | |  | |  |
| Western Europe | | 219.57(144.20-330.57) | | 111.10(72.54-170.01) | | 192.85(110.46-328.33) | | 103.18(58.72-175.70) | | -0.22 (-0.32- -0.13) |
| Australasia | | 15.34(8.87-26.66) | | 120.07(69.18-210.12) | | 12.61(6.99-23.46) | | 80.40(44.04-149.76) | | -1.32 (-1.40- -1.25) |
| Andean Latin America | | 139.49(88.25-213.78) | | 366.87(230.50-567.05) | | 108.18(65.59-175.39) | | 234.25(142.14-385.12) | | -1.52 (-1.65- -1.38) |
| Tropical Latin America | | 280.15(187.08-424.42) | | 201.46(132.69-309.00) | | 208.39(146.36-289.53) | | 172.75(119.75-244.44) | | -0.36 (-0.56- -0.15) |
| Central Latin America | | 610.49(426.50-867.38) | | 369.51(255.67-531.05) | | 459.54(330.59-665.96) | | 273.15(194.51-397.44) | | -0.83 (-1.01- -0.65) |
| Southern Latin America | | 53.79(31.99-85.55) | | 137.89(80.62-222.71) | | 44.23(22.55-76.46) | | 110.22(56.71-192.09) | | -0.40 (-0.51- -0.30) |
| Caribbean | | 78.21(54.28-109.44) | | 258.09(178.27-360.56) | | 68.33(44.63-95.40) | | 217.32(141.26-304.55) | | -0.69 (-0.90- -0.47) |
| Central Europe | | 137.98(95.09-201.48) | | 172.01(119.00-252.83) | | 59.57(37.53-90.81) | | 122.08(75.82-191.84) | | -0.93 (-1.03- -0.84) |
| Eastern Europe | | 173.14(123.27-251.44) | | 127.18(90.02-186.24) | | 55.01(34.52-88.15) | | 62.01(38.19-100.50) | | -2.90 (-3.13- -2.67) |
| Central Asia | | 186.37(137.51-259.46) | | 294.83(214.77-413.08) | | 203.98(151.04-272.37) | | 276.18(203.73-370.42) | | -0.40 (-0.52- -0.28) |
| North Africa and Middle East | | 1070.00(735.93-1487.20) | | 297.13(201.15-416.95) | | 891.07(614.96-1306.86) | | 187.97(128.83-277.16) | | -1.42 (-1.47- -1.37) |
| South Asia | | 3715.48(2247.29-5349.04) | | 346.49(207.10-500.01) | | 2941.33(2088.66-4051.06) | | 216.51(150.25-306.81) | | -1.38 (-1.51- -1.25) |
| Southeast Asia | | 661.48(418.71-976.28) | | 149.86(94.07-223.76) | | 621.20(397.13-938.12) | | 135.80(84.12-204.08) | | -0.41 (-0.45- -0.36) |
| East Asia | | 1885.96(1276.53-2460.02) | | 203.80(135.62-270.06) | | 620.21(426.13-908.43) | | 90.56(61.47-134.33) | | -2.62 (-2.76- -2.48) |
| Oceania | | 9.77(5.96-15.34) | | 148.88(88.70-237.91) | | 17.58(9.42-28.25) | | 134.06(72.03-220.09) | | -0.28 (-0.33- -0.23) |
| Western Sub-Saharan Africa | | 826.35(563.71-1187.83) | | 386.26(263.75-556.77) | | 2269.14(1543.63-3215.70) | | 401.21(268.35-577.98) | | 0.32 (0.14- 0.50) |
| Eastern Sub-Saharan Africa | | 1698.62(1205.32-2339.13) | | 791.48(559.13-1100.49) | | 2549.85(1876.18-3434.47) | | 542.02(395.64-738.87) | | -1.46 (-1.66- -1.26) |
| Central Sub-Saharan Africa | | 283.19(187.39-407.27) | | 471.84(307.17-682.72) | | 591.62(366.40-849.61) | | 379.51(234.01-555.14) | | -0.56 (-0.64- -0.48) |
| Southern Sub-Saharan Africa | | 142.45(101.70-195.82) | | 267.80(187.80-373.74) | | 154.06(109.72-217.04) | | 235.13(164.94-332.36) | | -0.46 (-0.53- -0.39) |
